# Supplementary material
Source: PubMed Central journal article supplement (PMC10502874)
Supplement: NIHMS1910925-supplement-Supplementary.pdf [file NIHMS1910925-supplement-Supplementary.pdf]

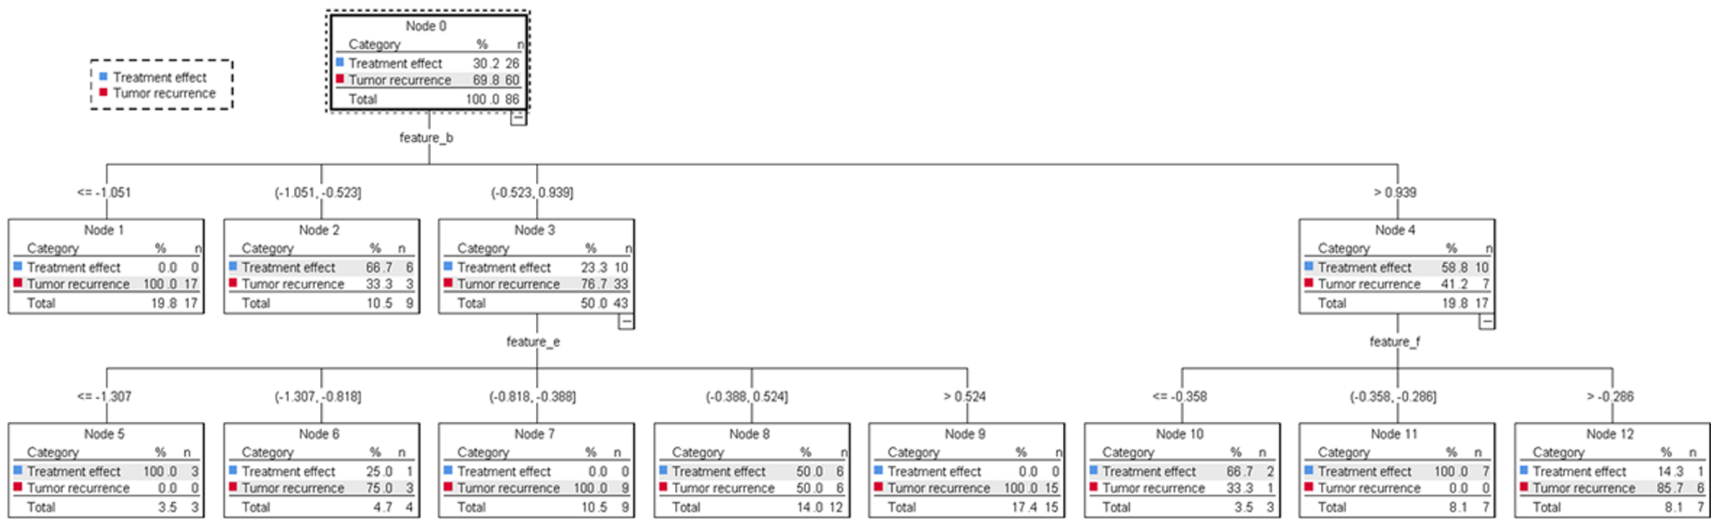

**Supplementary FIGURE 1** CHAID decision tree analysis based on the data from APTw MR images (Model IIA). Three (b, e, f) were identified as independent predictors with which to build a CHAID decision tree with two levels of tree depth and ten terminal nodes.

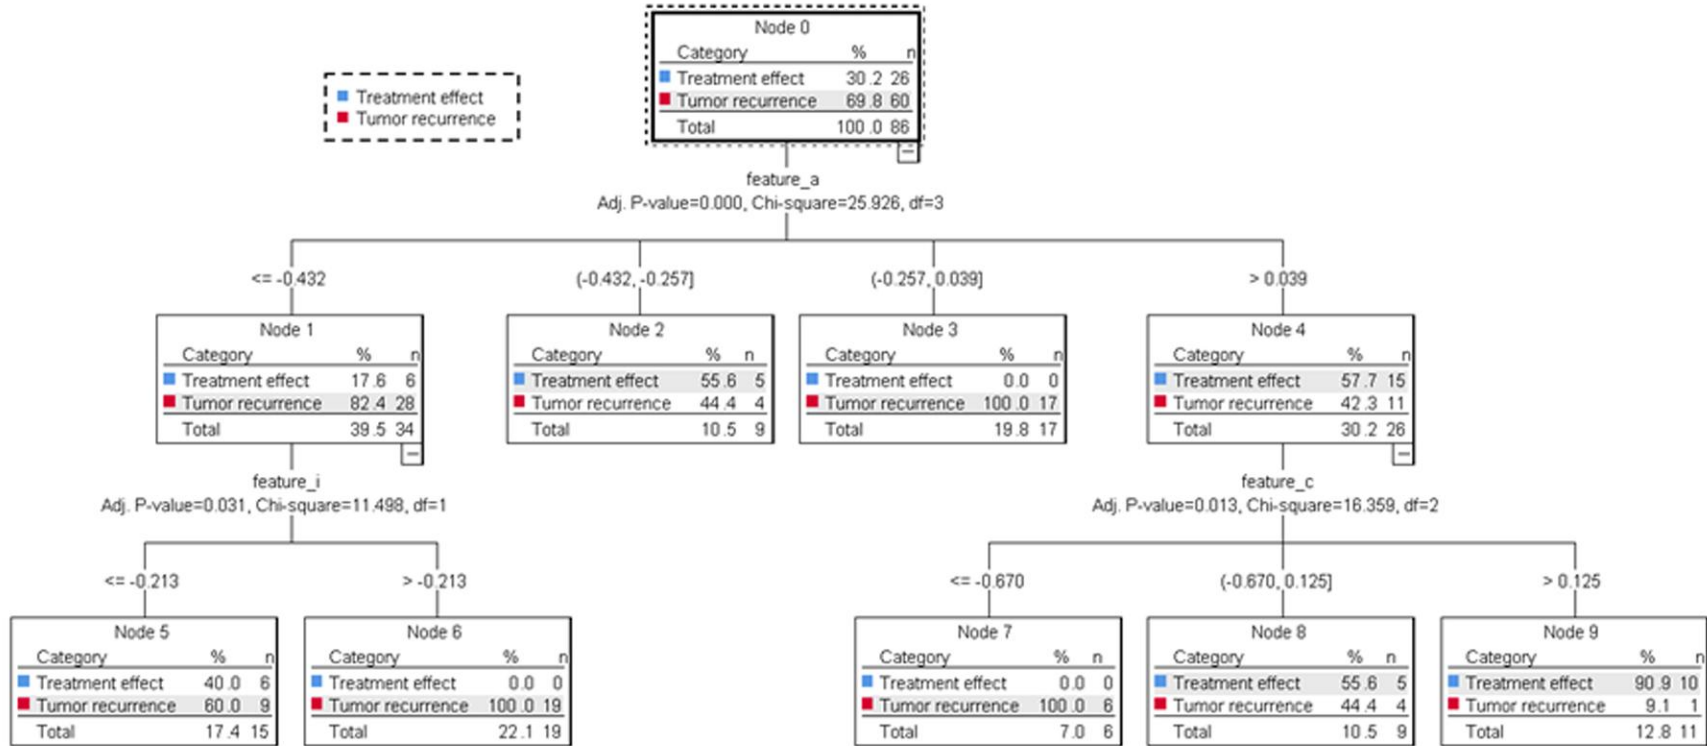

**Supplementary FIGURE 2** CHAID decision tree analysis based on the data from structural MR images (Model III). Three (a, c, i) were identified as independent predictors with which to build a CHAID decision tree with two levels of tree depth and seven terminal nodes.
